# Supplementary figures and images for: Mir-615-3p promotes osteosarcoma progression via the SESN2/AMPK/mTOR pathway
Source: PubMed Central journal article supplement — Cancer Cell Int. 2024 Dec 19;24:411. doi: 10.1186/s12935-024-03604-x (PMC11660548; doi:10.1186/s12935-024-03604-x), 2024-12-19

Figure 3E

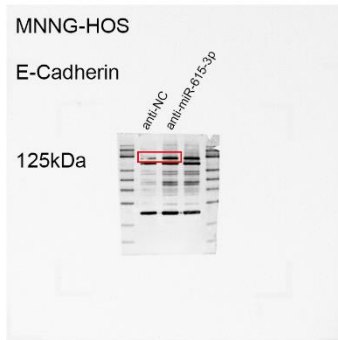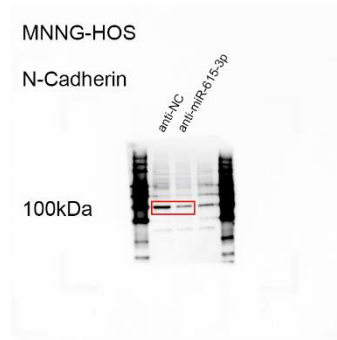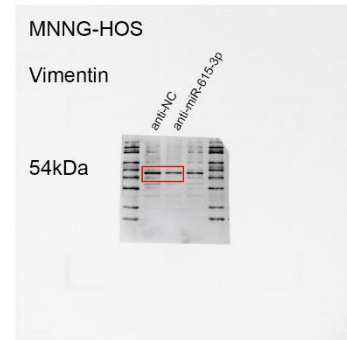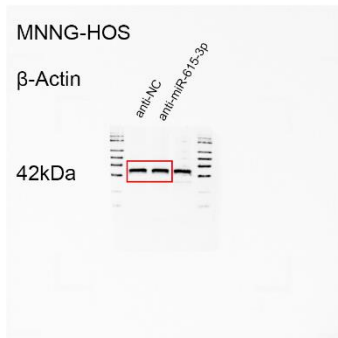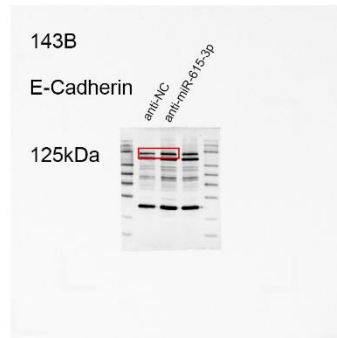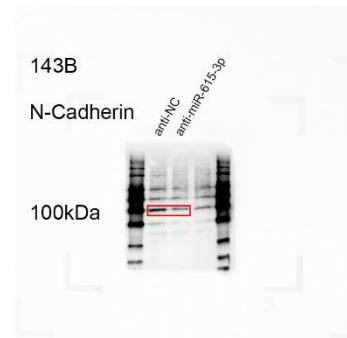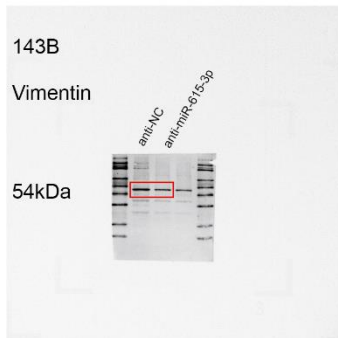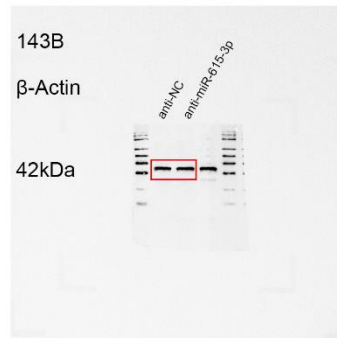

Figure 4A

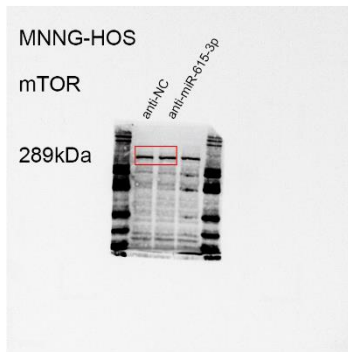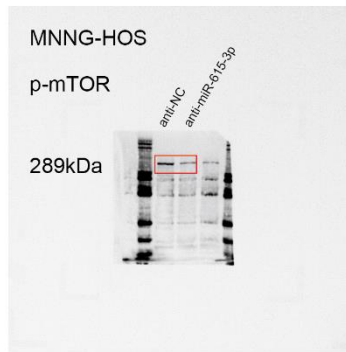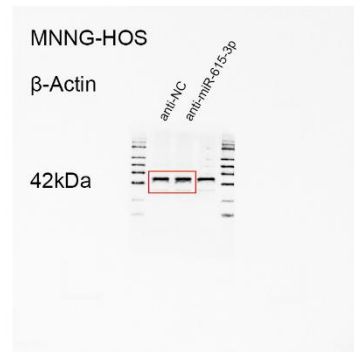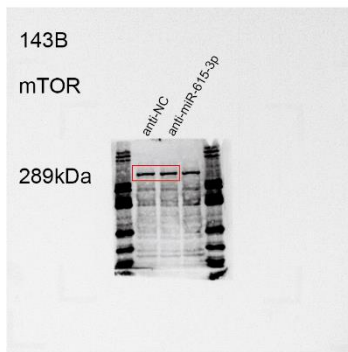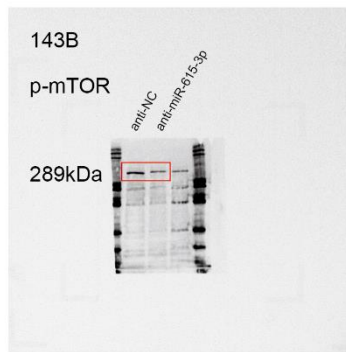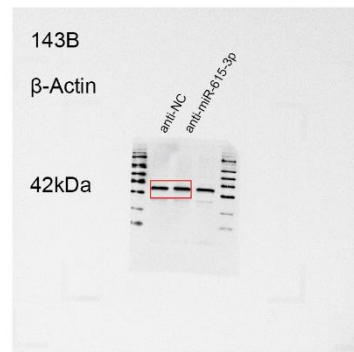

Figure 5A

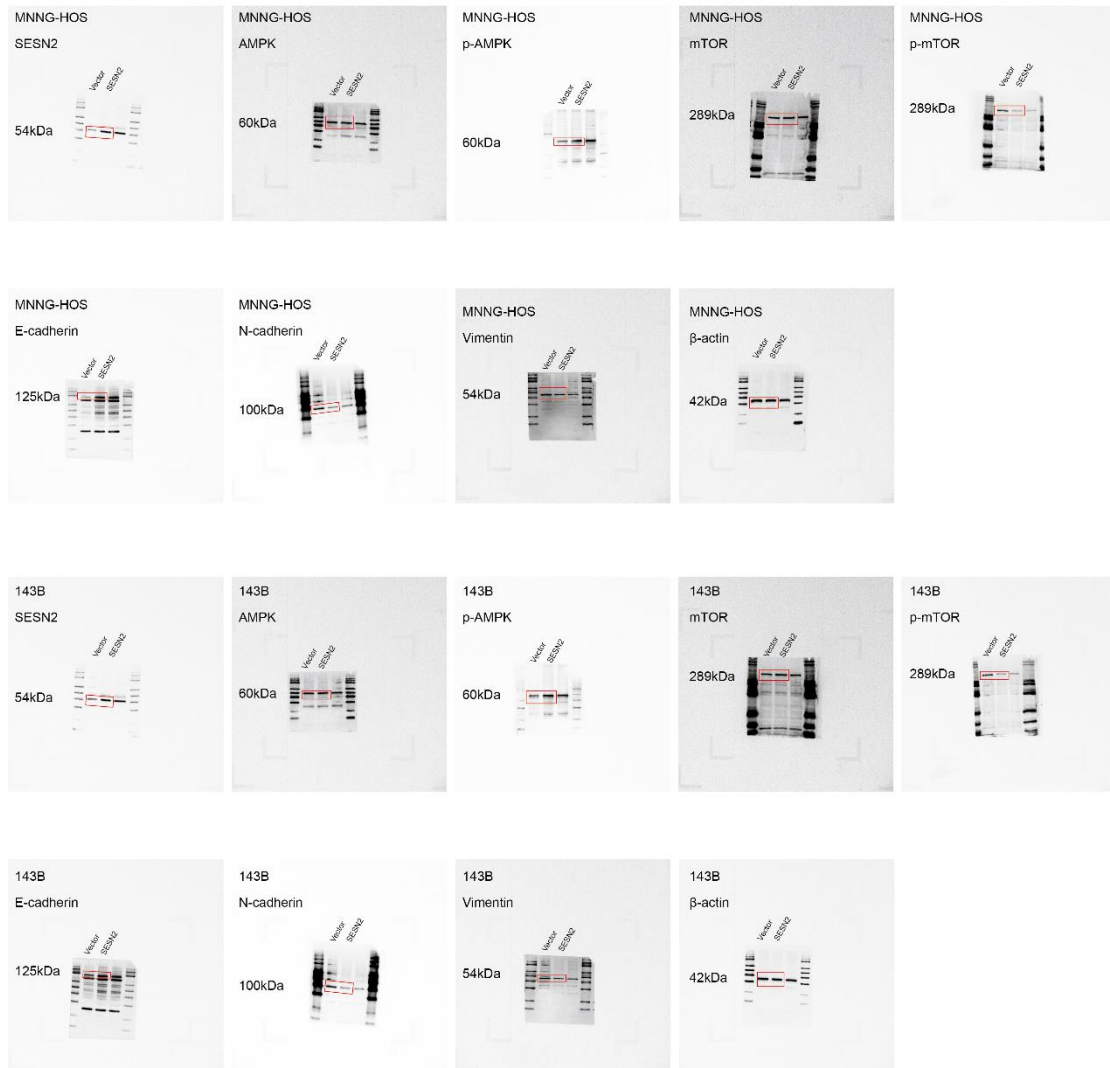

# Figure 6A

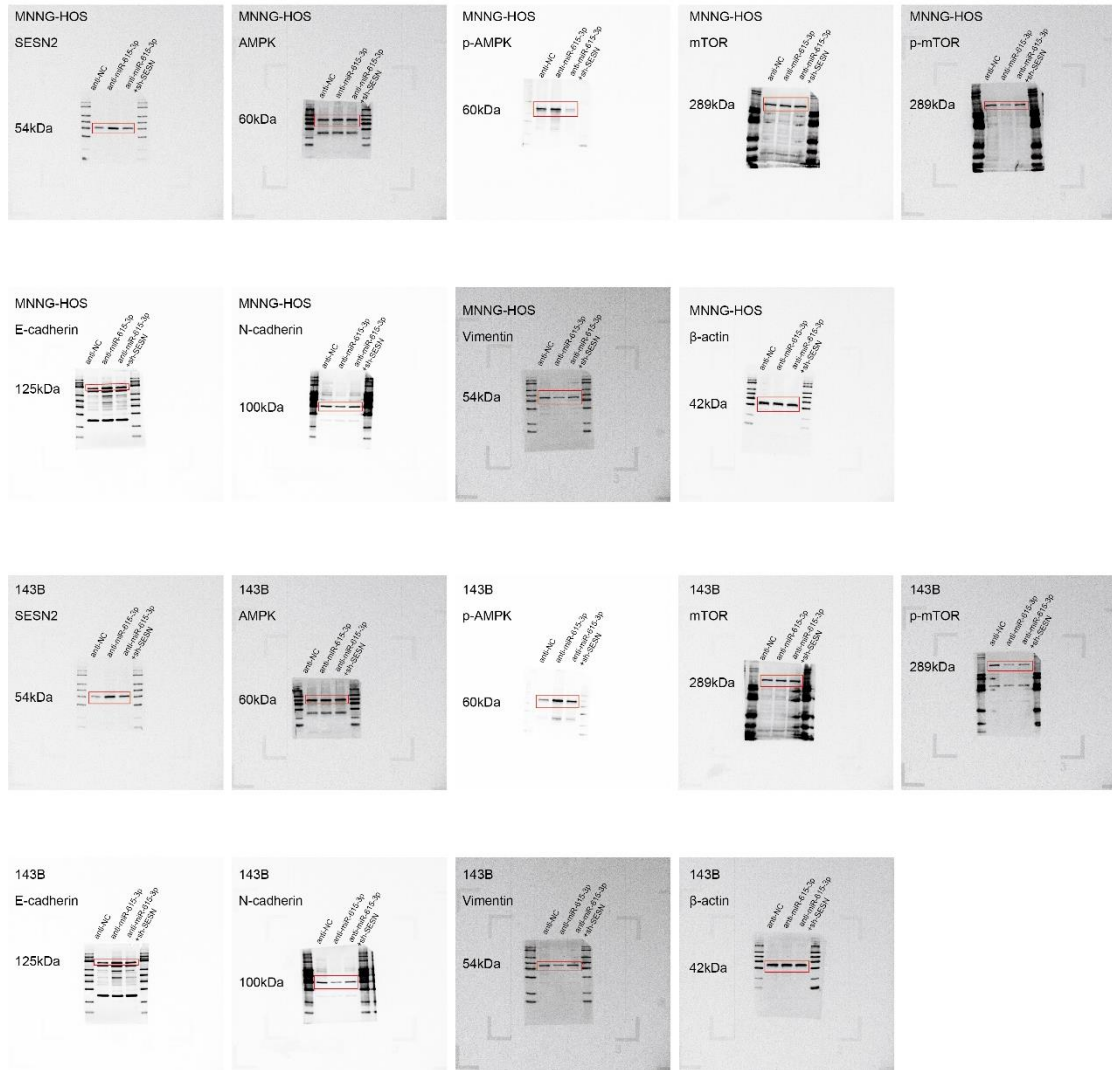

Supplement: 12935_2024_3604_MOESM1_ESM.pdf [file 12935_2024_3604_MOESM1_ESM.pdf]
